# Supplementary material for: Comparing soil carbon loss through respiration and leaching under extreme precipitation events in arid and semi-arid grasslands
Source: Copernicus journal article supplement (doi:10.5194/bg-2017-264), 2017-07-18
Supplement: Supplementary file 1 [file bg-2017-264-supplement.zip]

Archive with 2 entries (2 files):
- Soil carbon loss_Dataset S1.xlsx
- Soil carbon loss_SI.pdf
