# Supplementary material for: Comparing soil carbon loss through respiration and leaching under extreme precipitation events in arid and semi-arid grasslands
Source: Copernicus journal article supplement (doi:10.5194/bg-2017-264), 2017-07-18
Supplement: Supplementary file 1 [file bg-2017-264-supplement.zip › Soil carbon loss_Dataset S1.xlsx]

## Sheet: Dataset_S1
Figure 2: The δ13C values of respired CO2 in the litter-amended Gangcha (GC) soils after the first extreme precipitation event (EPE).
Time (days)	δ13C-CO2	δ13C-CO3_S.E.
1	-18.7433	0.417463
3	-19.3613	0.331543
6	-19.3693	0.488208
9	-19.4033	0.239872
11	-19.2705	0.0685
14	-20.771	0.0839305
25	-21.7513	0.242913
Non-amended	-23.099	0.32298
Figure 3: Extreme precipitation event (EPE)-induced CO2 release in the litter-amended and non-amended grassland soils.
		XLHT	KQ	GC	XLHT_S.E.	KQ_S.E.	GC_S.E.
EPE-induced CO2 release (g C m−2)	Non-amended	2.38985	4.21997	4.8403	0.180175	0.290472	0.345998
	Litter-amended	3.23017	8.39426	4.67636	0.259257	0.375457	0.301094
SOC in the column (g C)	Average	55.3	123.017	132.281	1.40544	0.0334656	0.250366
Figure 4: Fluxes of dissolved organic carbon (DOC) and dissolved inorganic carbon (DIC) and volume of leachates from soil columns after extreme precipitation events (EPEs).
	Average carbon flux (g C m-2)					S.E. of average carbon flux
	DOC leached from non-amended soils	DOC leached from litter-amended soils	DIC leached from non-amended soils	DIC leached from litter-amended soils	leachate (L)	DOC leached from non-amended soils	DOC leached from litter-amended soils	DIC leached from non-amended soils	DIC leached from litter-amended soils	leachate (L)
XLHT_First EP	1.18132	1.3614	4.19392	4.80355	0.568	0.0761845	0.186681	0.302294	0.143417	0.0406667
XLHT_Second EP	1.22687	1.22491	8.14073	7.48081	0.711833	0.117977	0.0721034	0.614677	0.194691	0.0331667
XLHT_Third EP	1.39164	1.60747	8.91189	8.99914	0.694333	0.0653255	0.102492	0.556549	1.24843	0.0126667
KQ_First EP	1.77976	1.98278	0.851595	0.9892	0.563833	0.0296088	0.0668316	0.0647135	0.015474	0.0365
KQ_Second EP	2.83508	3.08303	0.965904	1.16662	0.939667	0.192373	0.221187	0.0439335	0.0592204	0.019
KQ_Third EP	2.80343	2.63196	0.820438	0.937444	0.828	0.0294337	0.0658568	0.0323564	0.0151776	0.029
GC_First EP	0.765951	0.835455	2.34198	2.3215	0.732833	0.0455662	0.100767	0.552472	0.136608	0.0171667
GC_Second EP	0.98161	1.07783	2.31462	3.01282	0.868833	0.109241	0.173337	0.14516	0.209553	0.0201667
GC_Third EP	0.721514	1.07682	1.89335	2.8068	0.8895	0.0280429	0.310192	0.18606	0.573257	0.0105
Figure 5: The amount of carbonate- and soil organic carbon (SOC) degradation-derived dissolved inorganic carbon (DIC) leached from the XLHT soils.
	Average			S.E.
	First EPE	Second EPE	Third EPE	First EPE	Second EPE	Third EPE
Carbonate-derived (mg)	21.9954	30.7249	30.1757	0.671123	0.413058	1.2876
SOC-derived (mg)	10.9268	33.1798	39.7827	2.32153	4.59171	5.61947
Contribution from SOC degradation (%)	32.592	51.412	56.2965	4.52288	3.38084	4.62785
Figure 6: Relationship of dissolved inorganic carbon (DIC) and dissolved organic carbon (DOC) fluxes with soil properties
	SOC(g C per column)	SIC (g C per column)	silt+clay (%)	pH	pH_S.E.	FDOC (g C m-2)	FDIC (g C m-2)	FC (g C m-2)
XLHT_Non-amended soil	53.0549	35.3842	60.9065	9.05	0.06	3.53589	19.0228	22.5587
XLHT_Non-amended soil	55.7977	38.3205	60.9065	9.05	0.06	4.19495	22.8004	26.9953
XLHT_Non-amended soil	55.5533	38.6682	60.9065	9.05	0.06	3.66866	21.9165	25.5851
XLHT_Litter-amended soil	56.0829	39.0701	60.9065	9.05	0.06	4.16415	20.7368	24.9009
XLHT_Litter-amended soil	55.6002	38.7293	60.9065	9.05	0.06	3.84248	19.0501	22.8926
XLHT_Litter-amended soil	55.711	38.7189	60.9065	9.05	0.06	4.57468	24.0636	28.6383
KQ_Non-amended soil	123.017	0.696974	53.0617	7.66	0.11	7.23071	2.644	9.87471
KQ_Non-amended soil	123.046	0.697184	53.0617	7.66	0.11	7.22302	2.62586	9.84888
KQ_Non-amended soil	122.995	0.696802	53.0617	7.66	0.11	7.80109	2.64395	10.445
KQ_Litter-amended soil	123.091	0.697378	53.0617	7.66	0.11	8.29802	3.10044	11.3985
KQ_Litter-amended soil	122.96	0.696647	53.0617	7.66	0.11	7.25891	3.14421	10.4031
KQ_Litter-amended soil	122.995	0.696802	53.0617	7.66	0.11	7.53638	3.15933	10.6957
GC_Non-amended soil	131.836	20.8489	72.8176	8.63	0.12	2.59288	7.80706	10.3999
GC_Non-amended soil	132.57	20.9615	72.8176	8.63	0.12	2.15415	6.47294	8.62709
GC_Non-amended soil	132.036	20.8894	72.8176	8.63	0.12	2.66019	5.36986	8.03005
GC_Litter-amended soil	132.208	20.9148	72.8176	8.63	0.12	3.4303	7.68672	11.117
GC_Litter-amended soil	132.627	20.9684	72.8176	8.63	0.12	2.18109	7.67421	9.8553
GC_Litter-amended soil	132.411	20.9454	72.8176	8.63	0.12	3.35892	9.06245	12.4214
Figure 7: Leaching fluxes of dissolved organic carbon (DOC) and dissolved inorganic carbon (DIC) in this study compared with that reported in the literature
Carbon flux (g C m-2 yr-1)
Forest_DOC flux	Cropland_DOC flux	Grassland_DOC flux	This study_DOC flux	Forest_DIC flux	Cropland_DIC flux	Grassland_DIC flux	This study_DIC flux
0.4	1.2	1	7.55802	0.7	2.1	1.275	2.8863
0.4	1.2	1.7	2.72959	2	2	8.4	7.34554
0.54	0.7	1.7	2.50339	2.1	2	8.7	9.58657
0.6	0.6	1.70769	4.76147	2.7	1.35865	8.8	10.499
0.6	0.6	2	3.9968	3.4	0.851911	14.7	21.265
0.9	0.6	2		3.6	0.771127	16.1
0.9	0.45	2.12308		3.7	0.771127	26
0.96	0.45	2.12308		6.5	0.558149	39.1
1	0.383333	2.12308			0.233333	47.7
1.1	0.336667	2.35385			0.154225
1.3	0.33	3.1			-36.0226
1.65	0.25	3.41538			-40.3703
2	0.102817	3.73846			2.4
2.3	0.102817	3.83077			3.4
2.3	0.0807847	4.29231			3.51592
2.8	-0.0367203	4.52308			3.7
2.8	-0.0440644	4.61538			4
3	-0.0514085	4.61538			4.33333
3.12	-3.06247	5.3			4.7
3.2	-3.73078	5.9			4.8
3.78	1.2	6.41538			5.5
4	1.65	8.30769			5.6
4.11	2.6	8.6			5.8
4.3	2.7	8.8			7.06667
4.73	2.8	11.2			8
5	3.175	12.1			8.4
5.1	3.7	12.6462			10.5
5.5	3.7	12.8308			10.7
5.7	4.35	14.5			15.2866
6.099	5.3	22.8			18
6.3	7.4	25.2			20.1
6.362	97.8344	25.4308			21.1
6.6	405.096	25.4308
7		25.9846
7		26.2154
7.4		27.3333
7.4		28.1
7.906		29.4667
8		36.3692
8.41		38
8.58		44.5
9		56
9		56.1
9.3		70.8
9.961		94.3
10		169.2
10.3
10.4
10.7
10.875
11
11.47
11.7
12
12.3
12.8
12.8
13
13
13
13
13
13.4
13.9
14.4
14.6
15.4
15.48
16.1
16.2
16.7
16.9
17.27
17.4
17.6
17.6
17.8
18.7
19
19
21
21.3
21.8
22.5
23
23.625
24.375
25.1
25.3333
26.3
26.3
27
27.4
29.3
29.625
29.9
30.75
31.7
35
36.3
37
38
38
38.625
39.375
39.8
40.5
41
41.25
54.5
Figure S3: Variations of soil respiration rate after the simulated extreme precipitation events (EPEs).
XLHT_1st EPE_Respiration rate (mg C h-1 m-2)	Time (days)	Non-amended	Non-amended S.E.	Litter-amended	Litter-amended_S.E.	KQ_1st EPE_Respiration rate (mg C h-1 m-2)	Time (days)	Non-amended	Non-amended S.E.	Litter-amended	Litter-amended_S.E.	GC_1st EPE_Respiration rate (mg C h-1 m-2)	Time (days)	Non-amended	Non-amended S.E.	Litter-amended	Litter-amended_S.E.
	1	5.10142	0.725001	8.80235	1.225		1	23.9496	3.53083	32.6023	3.99691		1	17.7136	4.99487	17.0164	3.451
	2	7.26232	1.56338	11.8065	0.762161		2	28.7604	4.28806	35.0182	6.44129		2	17.1839	3.01564	20.264	1.99991
	3	10.7465	3.49916	13.8618	1.31152		3	29.51	3.66924	39.1501	7.06644		3	19.5729	2.0145	21.3514	2.54129
	4	11.7242	1.51009	15.0346	1.45664		4	33.7922	3.42223	43.2391	7.347		5	23.3653	3.39896	25.9773	4.20289
	5	11.9208	1.30223	14.8679	1.63423		5	35.7607	2.39732	45.5062	4.10621		6	23.5121	2.16565	26.5313	4.26345
	6	11.7793	1.06146	13.9516	1.26627		6	37.2409	4.05679	47.2936	6.00288		7	26.7767	4.45625	28.5958	3.57301
	7	12.3909	1.36501	15.0374	1.13321		7	36.1895	4.2231	46.4872	4.22829		8	26.5069	3.53821	29.5429	3.29042
	8	11.8815	1.97909	14.2242	1.27991		8	40.5922	5.68091	49.035	8.64359		9	27.1428	4.2012	30.5558	3.50601
	9	11.9445	2.14375	14.3714	1.19417		9	35.3702	3.29585	44.5198	8.68162		10	26.7746	3.14556	29.6977	2.78423
	10	10.8722	2.06533	13.8308	0.832986		10	33.9463	2.65712	43.0095	7.95905		11	25.0265	2.48937	27.5815	2.55739
	11	10.7205	2.18309	12.1511	1.12507		11	32.586	5.26519	38.7277	5.89694		13	24.4669	2.97804	25.4771	4.15675
	12	11.5059	1.52797	14.2878	1.02024		12	29.8417	2.66811	34.807	4.36608		14	22.0587	3.06292	23.793	1.58581
	13	10.7787	2.27969	13.2307	0.798662		13	28.4336	3.32715	32.146	3.58442		15	19.5581	2.69457	21.7608	0.676992
	14	10.0795	2.58473	12.7755	1.31488		14	27.5164	3.32996	31.7313	3.02949		20	18.2874	3.08963	20.42	1.49731
	15	10.2232	2.60681	13.1319	1.16068		19	26.9657	2.69731	30.7111	2.97585		24	17.0167	3.4847	19.0793	2.31763
	20	7.58623	0.796444	9.26714	1.48017		20	26.4599	3.51101	30.5117	3.22969		25	16.4128	3.68061	19.174	2.20611
	29	7.36433	0.796444	9.28361	1.79966		21	25.9542	4.3247	30.3124	3.48352		26	16.9956	3.50068	19.2212	2.24342
							23	25.8015	4.02052	31.0753	4.09465
							27	26.3666	4.1023	31.2746	4.1738
XLHT_2nd EPE_Respiration rate (mg C h-1 m-2)	1	6.70381	0.301876	8.85057	1.09973	KQ_2nd EPE (not determined)						GC_2nd EPE_Respiration rate (mg C h-1 m-2)	1	17.398	3.1006	24.6163	1.52488
	2	9.71625	0.887635	11.5277	0.480303								2	25.739	4.31614	28.6261	4.59015
	4	10.1494	0.556154	12.3568	0.625858								3	28.599	5.10255	33.2898	7.45534
	6	11.1509	2.58595	13.9608	1.32689								4	30.2525	2.08293	38.062	7.02651
	8	13.6722	1.96755	15.6255	0.326249								5	33.1035	3.24884	36.3692	2.72202
	11	12.7766	0.654237	14.07	1.08018								6	34.5341	4.45101	39.5652	8.03725
	13	12.1216	1.33293	13.4077	0.36136								7	36.2534	4.47404	42.5924	2.88759
	14	11.0637	1.96587	12.4164	0.573273								8	30.7618	4.68745	38.0532	6.88647
	16	9.49754	1.61496	11.2519	0.542582								9	32.057	4.37634	38.234	3.27855
	18	8.35657	0.810309	9.83219	1.55263								10	26.3002	3.42649	32.2724	3.30618
	20	8.35657	0.810309	9.83219	1.55263								11	27.853	4.57184	32.0187	3.68955
													12	22.3654	0.885641	27.926	2.27473
													13	24.8836	2.1189	28.4146	3.80787
													14	21.4548	1.6399	29.9362	4.12161
													15	22.3497	2.32492	29.5022	2.47041
													17	23.6299	4.30739	30.7543	2.30855
													20	23.6299	4.30739	30.7543	2.30855
XLHT_3rd EPE_Respiration rate (mg C h-1 m-2)	1	8.78454	1.9911	10.2359	1.09233	KQ_3rd EPE_Respiration rate (mg C h-1 m-2)	1	20.9542	2.58012	29.4312	2.79737	GC_3rd EPE_Respiration rate (mg C h-1 m-2)	1	21.8734	2.92648	32.5662	3.4938
	2	9.2185	0.725674	10.1712	1.21472		2	23.2717	5.23697	31.195	6.65417		2	28.3032	2.76776	33.612	3.33855
	3	10.0117	2.24145	11.789	0.846949		3	28.0601	3.93005	37.9845	6.93013		3	33.3255	5.50447	36.2873	4.20835
	4	10.6952	0.891721	12.3955	1.4311		4	34.5742	4.72412	44.4567	7.83211		4	33.5942	2.6182	37.7425	2.94981
	5	11.0866	2.15305	13.0758	1.26906		5	36.0644	3.33563	45.4182	4.75884		5	34.6562	1.76211	40.6013	1.55218
	6	12.0439	2.98794	14.2709	1.82942		6	38.2411	3.62655	47.7477	6.68626		6	35.6766	2.92351	40.2076	2.58076
	7	10.8816	2.22059	13.7114	1.08101		7	36.0329	6.03394	46.3447	4.24698		7	37.2871	3.49663	41.6165	3.1063
	8	11.045	1.69131	12.4363	1.43235		8	37.4437	3.85027	43.405	4.545		8	36.3017	2.82639	40.0246	1.74067
	9	9.72123	1.38447	11.7426	1.23276		9	34.7149	2.21947	44.2484	4.4933		9	36.2558	5.28383	40.1053	4.14662
	10	9.89855	1.84038	11.5109	0.740335		10	32.3671	3.90045	39.8951	6.1303		10	34.8128	3.85614	36.7576	3.70004
	11	9.31182	1.63711	10.5911	1.25582		11	32.8728	2.91083	41.3559	3.73723		11	34.0144	4.97308	36.1269	5.07548
	12	9.47831	1.76318	10.4522	0.941908		12	33.818	3.19813	40.442	3.49668		12	33.1685	4.43409	35.8744	1.43932
	13	8.54367	0.538246	10.0109	1.25284		13	32.9491	3.00056	39.7634	4.16025		13	32.3938	3.6665	35.2674	4.84408
	14	8.15855	0.526359	9.03322	1.7353		14	32.5359	4.03049	38.4262	6.48808		14	32.6007	3.73217	35.3801	3.25362
	18	8.14955	0.10617	9.03309	1.80056		15	31.0124	3.18233	35.3055	5.62074		16	30.7017	3.15006	34.6207	3.0296
	20	8.14955	0.10617	9.03309	1.80056		18	30.0676	4.19426	33.8477	3.81055		17	30.8949	3.84675	34.3058	4.35789
													19	30.4464	5.66904	34.5858	2.31018
Figure S4: Cumulative respiration in the non-amended and litter-amended soils during the first 20 days after three extreme precipitation events (EPEs) relative to that estimated using basal respiration rates stabilized after EPEs.
	Cumulative respiration during 20 days after EPE				estimated using basal respiration rates stabilized after EPEs
	Non-amended	Non-amended_S.E.	Litter-amended	Litter-amended_S.E.	Non-amended	Litter-amended
XLHT	13.9542	0.180175	16.7337	0.259257	11.5643	13.5036
KQ	44.8547	0.290472	54.8393	0.375457	40.6347	46.4451
GC	38.6986	0.345998	44.6243	0.301094	33.8583	39.948
Figure S5: Total amount of soil organic carbon (SOC) and soil inorganic carbon (SIC) in different layers of the artificial soil columns.
	SOC (g)			S.E. of SOC
	XLHT	KQ	GC	XLHT	KQ	GC
40-60 cm	12.433	30.4291	34.9814	0.210466	0.00610743	0.0302461
20-40 cm	18.2513	46.1194	45.397	0.484025	0.00902518	0.0717791
0-20 cm	24.6157	46.4685	51.9029	0.225025	0.0082403	0.0661822
	SIC (g)			S.E. of SIC
	XLHT	KQ	GC	XLHT	KQ	GC
40-60 cm	19.6449	0.289637	8.61727	0.332548	5.8133e-05	0.00745079
20-40 cm	11.7428	0.204992	6.92136	0.311419	4.01153e-05	0.0109437
0-20 cm	6.76086	0.202336	5.38276	0.0618044	3.58803e-05	0.00686363
